# Supplementary material for: Graphene as membrane for encapsulation of yeast cells: protective and electrically conducting
Source: Royal Society of Chemistry journal article supplement (doi:10.1039/c1cc15096k), 2011-01-01
Supplement: c1cc15096k.pdf [file c1cc15096k.pdf]

## Electronic Supplementary Information

### Graphene as Membrane for Encapsulation of Yeast Cells: Protective and Electrically Conducting.

*Ravindra Kempaiah, Shehan Salgado, Wai L. Chung, Vivek Maheshwari\**

#### Contents

|                                                                 |   |
|-----------------------------------------------------------------|---|
| Procedure for the synthesis of graphene oxide.....              | 1 |
| Surface functionalization.....                                  | 2 |
| Reduction of graphene oxide.....                                | 2 |
| Calcium-Gold solution (Ca-Au).....                              | 2 |
| Graphene-Calcium-Gold solution (CRG-Ca-Au) .....                | 3 |
| Harvesting of <i>Saccharomyces Cerevisiae</i> (Yeast cell)..... | 3 |
| <i>Saccharomyces Cerevisiae</i> (Yeast cell) on CRG-Ca-Au ..... | 3 |
| Live-Dead test .....                                            | 3 |
| Apparatus .....                                                 | 4 |
| Characterization and Results.....                               | 4 |

#### Procedure for the synthesis of graphene oxide

Graphene oxide was synthesized via the modified Hummer's method. Graphite flakes (~ 325 mesh size, Alfa Aesar) were oxidized using a combination of powerful reagents i.e., sulphuric acid ( $\text{H}_2\text{SO}_4$ ), potassium per sulphate ( $\text{K}_2\text{S}_2\text{O}_8$ ), phosphorous pentoxide ( $\text{P}_2\text{O}_5$ ). 3g of graphite flakes were dissolved in 10 ml of  $\text{H}_2\text{SO}_4$ . Oxidizing agents  $\text{K}_2\text{S}_2\text{O}_8$  and  $\text{P}_2\text{O}_5$  were added to the graphite in sulphuric acid and stirred at 90 °C till the flakes were dissolved. The stirring continued for 4 more hours at 80 °C and the solution was then diluted with 500 ml of Milli-Q Millipore™ water (Ultrapure water > 16MΩ). After the dilution, the solution was stirred overnight, filtered, washed with de-ionised water and then dried to get the powdered form of graphene oxide.

Pre-oxidized GO powder was then subjected to further oxidation with 125 mL of H<sub>2</sub>SO<sub>4</sub> and 15g of Potassium permanganate (KMnO<sub>4</sub>) in an ice bath where the solution was stirred for 2 more hours. 130 mL of Milli-Q Millipore™ water was added to the mixture and this caused the temperature to rise to 95 °C. After 15 minutes, 15 mL of Hydrogen Peroxide (H<sub>2</sub>O<sub>2</sub>) was added to reduce the manganese in the solution to manganese sulphate (Mn → MnSO<sub>4</sub>). Finally, the solution was diluted with 400 mL of Milli-Q Millipore™ water and resultant yellow suspension was stirred overnight. GO was filtered and washed till the rinsed water pH was found to be approximately 7.[1, 2]

### **Surface functionalization**

For this purpose, Silicon chips patterned with gold electrodes were washed with 2-propanol and Milli-Q Millipore™ water and subsequently sonicated in 50:50 by volume solution of 2-propanol and Milli-Q Millipore™ water to remove any residual particles on the surface. Their surface was then hydroxylated by placing them in “piranha” solution (7:3 concentrated H<sub>2</sub>SO<sub>4</sub>: 30% H<sub>2</sub>O<sub>2</sub>) (**CAUTION**: piranha solution reacts violently with organic compounds!). The chips were then washed thoroughly with Millipore™ water. The chips were then placed in a solution of (3-Aminopropyl)triethoxysilane ( 1mL in 100 mL of Millipore™ water ) for 10 minutes. The chips were then annealed on a hot plate at 120 °C for 30 minutes. Once cooled, the chips were used for the deposition.[2]

### **Reduction of graphene oxide**

Reduction of graphene oxide to graphene was accomplished using a reducing sugar i.e., glucose. 40mg of glucose was added to a solution of graphene oxide (0.1mg /1mL) in a vial and stirred for 40 min. 20μL of ammonia solution (28% W/W NH<sub>4</sub>OH) was then added and the mixture was stirred at 90 °C for 60 min. The resultant solution was centrifuged (10,000 rpm), washed with Millipore™ water and then re-suspended in Millipore™ water for further use. [3]

### **Calcium-Gold solution (Ca-Au)**

Calcium-Gold solution was found to be a favourable binding agent and it was prepared by mixing calcium chloride solution with the gold colloid in the ratio 1:11 respectively. Calcium chloride solution was prepared by dissolving anhydrous calcium chloride in Millipore™ water (1mg/1mL solution). Thus prepared calcium chloride solution was mixed with gold colloid (10nm, BBI International) and stirred for 24 hours. The change in color from wine red to blue indicated the formation of gold nanoparticle chain. [4]

### **Graphene oxide-Calcium-Gold solution (GO-Ca-Au)**

Graphene oxide is attached to the Calcium-Gold nanoparticles by mixing the solutions of GO and Calcium-Gold (Ca-Au). GO ( 0.5mg/1mL) solution is centrifuged at 500 rpm for 3 min

to remove micron sized particulates and then added to preformed Calcium-Gold solution in the ratio 1:20 and stirred for 8 hours to get homogeneous solution of GO-Ca-Au.

### **Harvesting of *Saccharomyces Cerevisiae* (Yeast cell)**

*S. cerevisiae* strain BY4741 (MATa his3 $\Delta$  leu2 $\Delta$  met15 $\Delta$  ura3 $\Delta$ ) is used in the experiments. 2g of yeast-peptone-dextrose broth (YPD) broth powder was dissolved into 40mL of Millipore™ water and autoclaved to get the broth solution. Yeast cells were grown in YPD broth at 30 °C for 8 hours, shaking at 200 rpm. After 8 hours, the cells reach a logarithmic growth phase and they are centrifuged and subsequently washed with Millipore™ water to remove any YPD residue. Washed cells were re-suspended in water for further deposition with graphene.

### ***Saccharomyces Cerevisiae* (Yeast cell) on CRG-Ca-Au**

Yeast cells harvested after 8 hours of growth in the YPD broth were centrifuged and washed. 100 $\mu$ L of such cell suspension is added to 1mL of CRG-Ca-Au solution and allowed to mix for an hour.

### **Live-Dead test**

The viability of the yeast cells after the deposition with Ca-Au-CRG was studied using a Molecular probes® L-7009 LIVE/DEAD® Yeast Viability Kit (Invitrogen™). The kit consists of two-color fluorescent probe FUN® 1 which stains the cell body, with a fluorescent fungal surface labeling reagent Calcofluor™ White M2R. We mixed 260.3mg of HEPES powder in 100mL of Millipore™ water to get 10mM of Na-HEPES buffer; 2g of glucose was added to HEPES buffer and the resultant solution was used as the medium for staining the cells with the dye reagent. 3mL of 10 $\mu$ M and 2mL of 60 $\mu$ M FUN 1 reagent solutions were prepared by mixing the stock 10mM dimethylsulfoxide (DMSO) cell stain into sterile GH solution. *Saccharomyces Cerevisiae* (yeast cells) were grown in YPD broth for 8 hours, centrifuged and washed 2 times before mixing it with the CRG-Ca-Au solution as described in the previous sections. After incubating for an hour, the solution was centrifuged and re-suspended in GH solution. CRG-Ca-Au-yeast cells in GH solution were finally stained with FUN 1 reagent solutions (10 $\mu$ M and 60 $\mu$ M) by mixing it in the ratio 50:50. 5 $\mu$ L of 25 $\mu$ M Calcofluor solution prepared from its 5 $\mu$ M stock solution.

### **Apparatus**

AFM was conducted with a Veeco DI Dimension 3100 Nanoscope IV scanning probe attached with a tapping tip. Field Emission Scanning electron microscopy (FESEM) was done with a LEO 1530 Gemini field emission gun attached with EDX/OIM. TEM images were obtained with a LEO 912ab energy filtered transmission electron microscope (EFTEM). Optical

spectroscopy was carried out using USB4000 (ocean optics) spectrometer. Electrical characterization was done using a custom-built IV setup consisting of Agilent 6614C DC power supply and Hewlett Packard 3458A multimeter. Raman spectra were obtained on a J-Y T64000 Raman spectrometer with 514.5 nm wavelength incident laser light. Confocal Microscopy was done on an upright Leica DM 6000B microscope.

## Characterization and Results

The AFM images of the synthesized GO sheets deposited on silicon wafers is shown in Fig. S-1. A typical thickness of  $\sim 1$ -1.25 nm with size of microns is observed for the sheets.

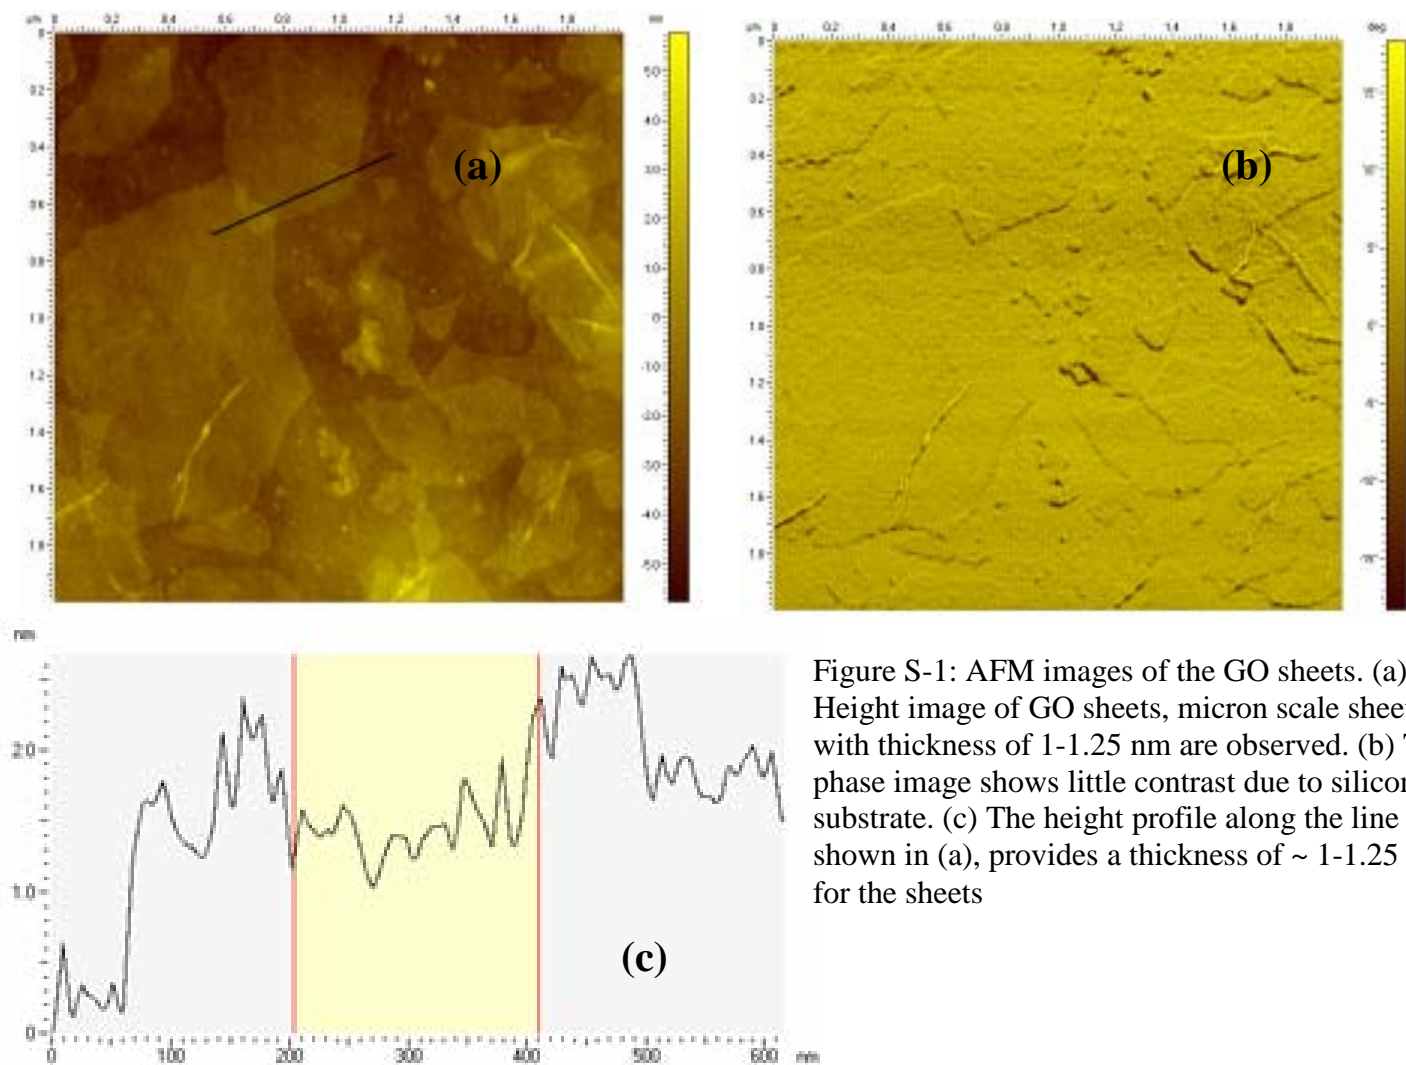

Figure S-1: AFM images of the GO sheets. (a) Height image of GO sheets, micron scale sheets with thickness of 1-1.25 nm are observed. (b) The phase image shows little contrast due to silicon substrate. (c) The height profile along the line shown in (a), provides a thickness of  $\sim 1$ -1.25 nm for the sheets

The Raman spectrum for the GO sheets shows the typical G and D bands at  $\sim 1600\text{ cm}^{-1}$  and  $1363\text{ cm}^{-1}$  respectively (Fig. S-2a). The presence of D band signifies the presence of oxidized region (unordered) in the  $\text{sp}^2$  hybridized matrix of graphene sheets. On reduction to graphene the relative intensity of the D/G bands increases from 0.93 to 0.99 due to a reduction in the average size of the ordered regions. This occurs due to formation of small ordered regions from the previously unordered oxidized regions in the sheets.[5]

The 2D band is observed as a shoulder at  $\sim 2720\text{ cm}^{-1}$  in the graphene oxide as it is only partially oxidized form of graphene. On reduction to CRG the intensity of the 2D band increases (Fig. S-2b). For graphite only a very sharp G band at  $1574\text{ cm}^{-1}$  is observed due to the  $\text{sp}^2$  network of carbon atoms.[6] Also observed is a prominent 2D band at  $2730\text{ cm}^{-1}$  a characteristic for graphitic material.[6] These observations are consistent with the reported observations on graphene oxide and the effect of reduction. [5, 6, 7]

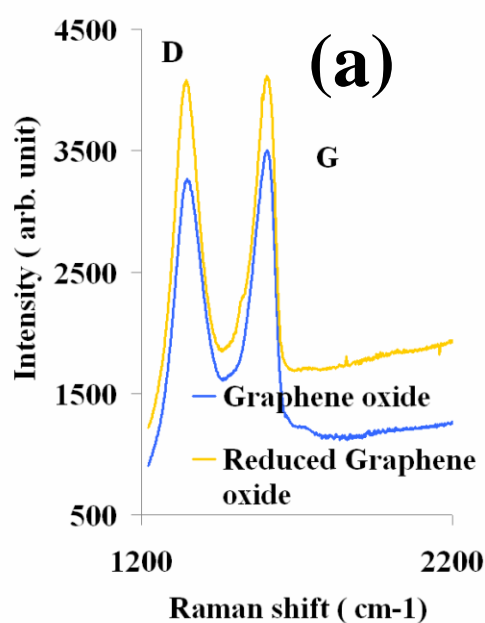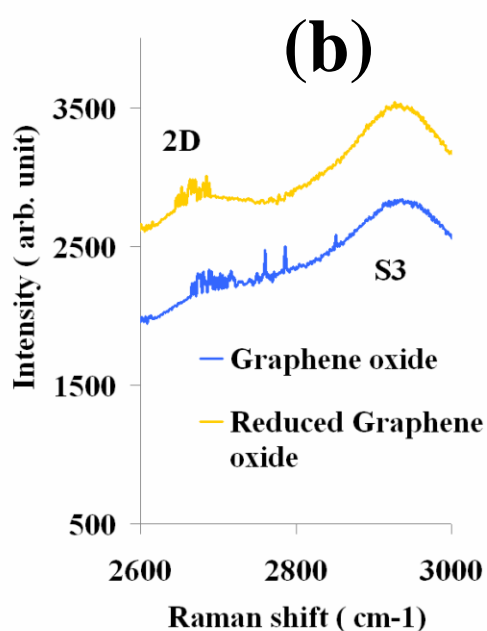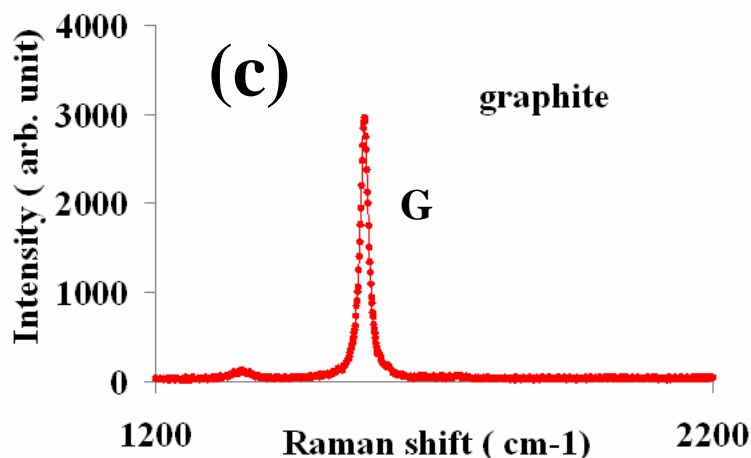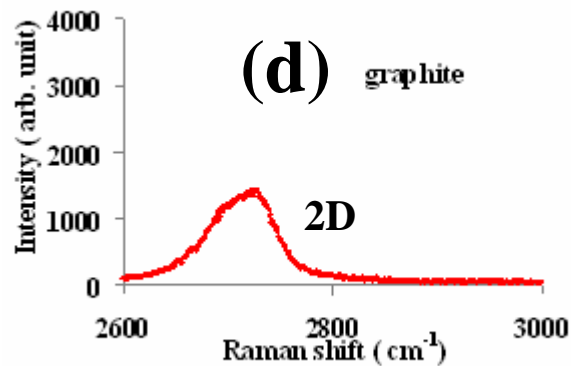

Figure S-2: (a) & (b) The Raman spectra for GO shows the typical G band at  $1600\text{ cm}^{-1}$  and the D band at  $\sim 1363\text{ cm}^{-1}$ . On reduction to CRG both the bands are still observed but the D/G intensity increases. The 2D band is observed at  $2720\text{ cm}^{-1}$  as a weak shoulder in the GO and CRG samples. Its intensity increases on reduction of GO to CRG. (c) & (d) For graphite sample a very prominent G band is observed  $\sim 1574\text{ cm}^{-1}$ . Also observed is a very sharp 2D band at  $2730\text{ cm}^{-1}$ .

There is minimal change observed in the fluorescence spectrum of the FUN1 dye after incubation with CRG-Ca-Au sheets (Fig. S-3). The primary effect is only a reduction in the fluorescence intensity. This is a common effect observed with graphene sheets, where the absorbance of dye molecules on the sheets leads quenching.[8]

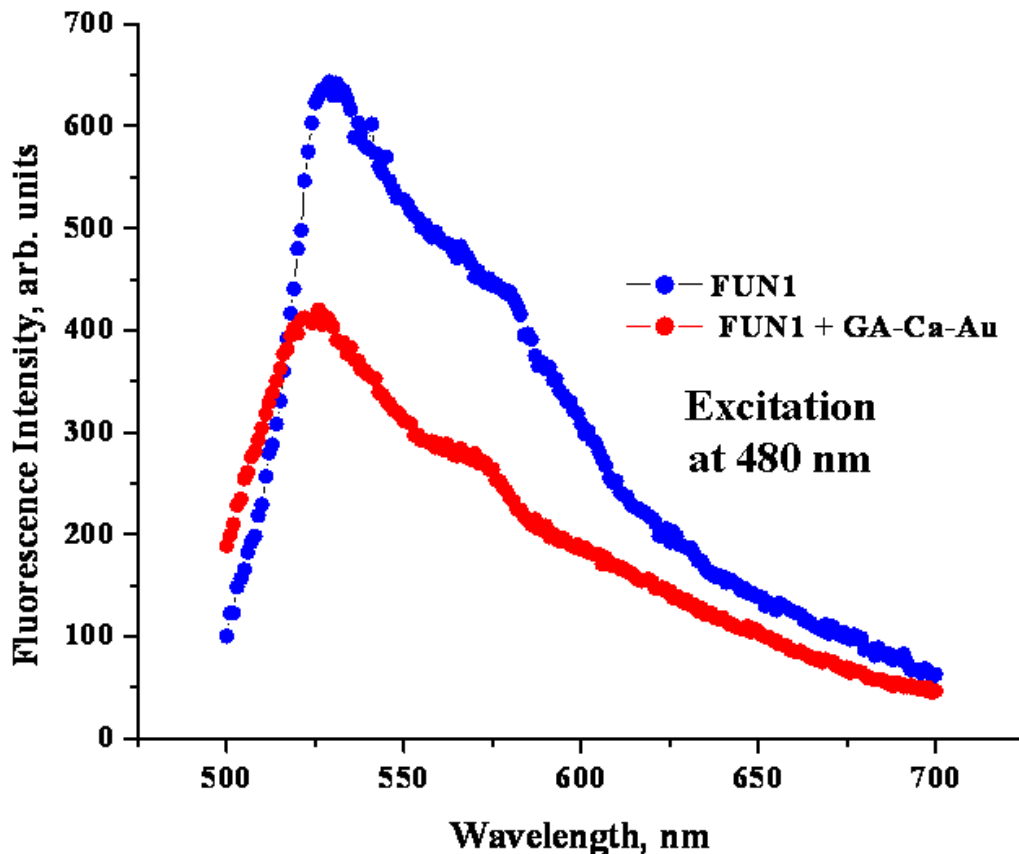

Figure S-3: Both plain FUN1 dye and FUN1 incubated with CRG-Ca-Au solution shows solution shows the characteristic emission at  $\sim 520\text{ nm}$  (green) and a shoulder at  $\sim 570\text{ nm}$ . No shift in fluorescence is observed for the dye on incubation with CRG-Ca-Au solution.

Due to the reduction in cell volume in FESEM, the graphene sheets not only wrinkle but also the spacing between them decreases.

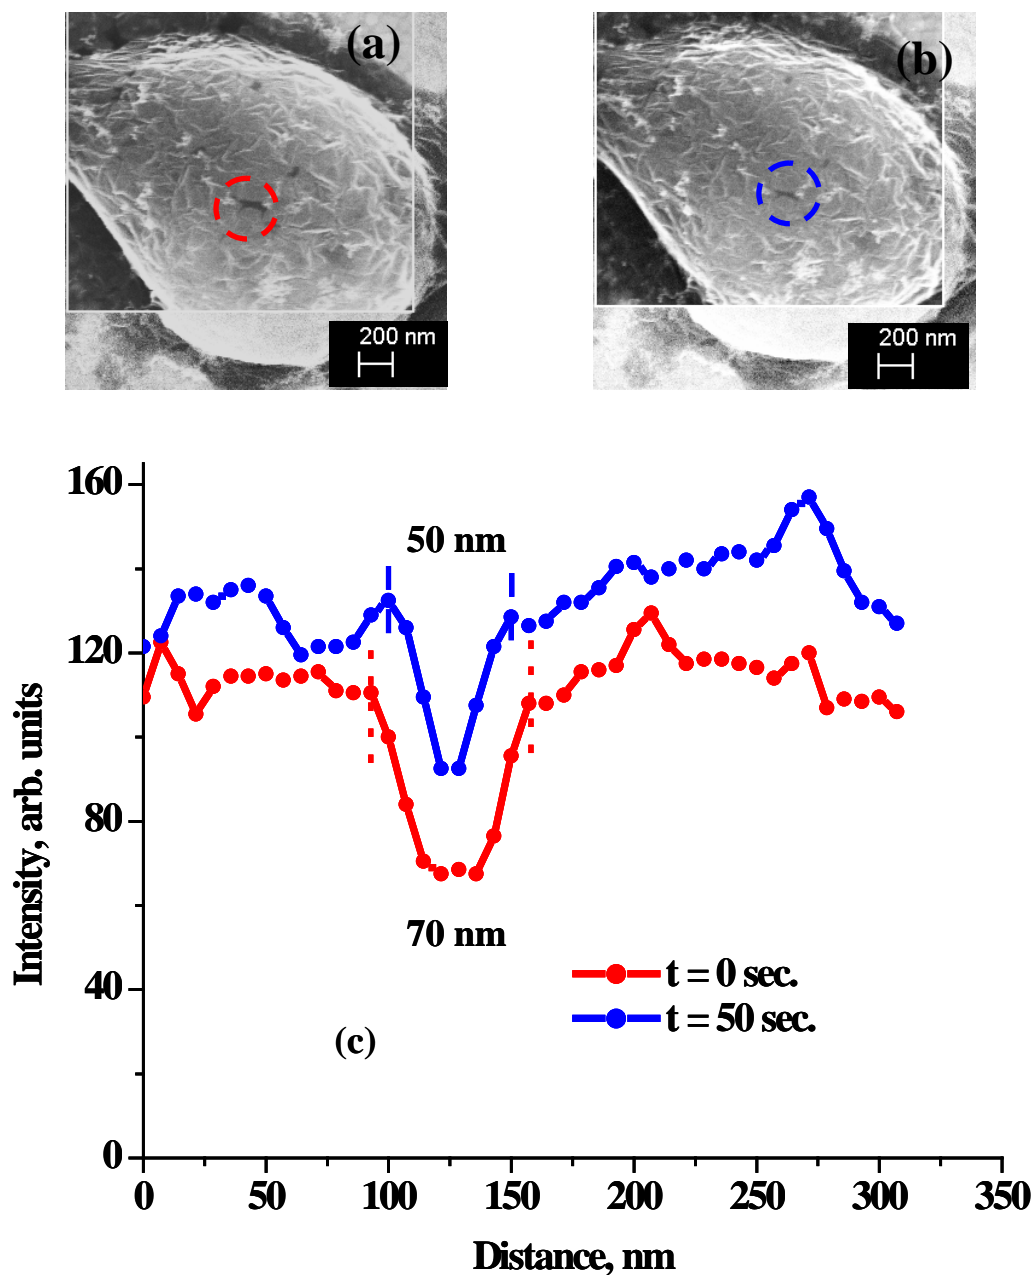

Figure S-4: FESEM images of CRG-cell. (a) FESEM image of the GRC-cell after 4 minutes in FESEM. Encircled is an opening between the GRC sheets on the cell. (b) After further 3 minutes in the high vacuum of FESEM the opening shrinks. (c) From the lines scan it is calculated that the opening shrinks from ~ 70 nm to 50 nm in 3 minutes.

Plain SaC cells and CRG sheets fail to interface in absence of Ca-Au nanoparticles, as seen in Fig. S-5.

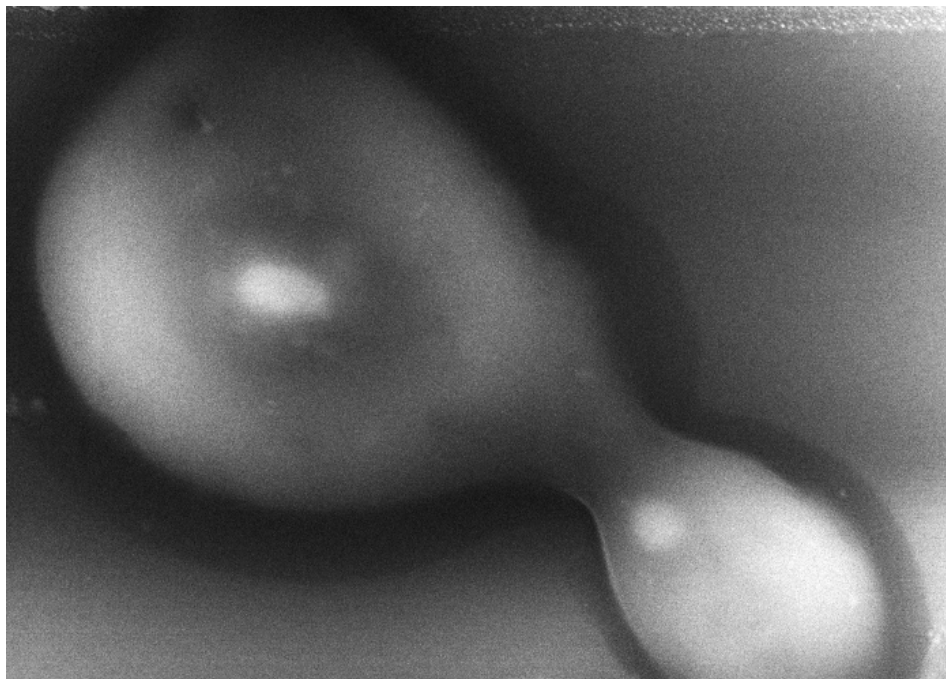

Figure S-5: FESEM image of SaC cells showing that they do not interface with CRG in absence of Ca-Au nanoparticles.

The binding between SaC cells and GO-Ca-Au is qualitatively similar to that of CRG-Ca-Au (Fig. S-6). However when GO is reduced to CRG its conductivity increases by more than three orders of magnitude.[9] This is important for application of these cells as electrical devices and sensors. The reported Young's modulus for CRG is  $\sim 0.3$  TPa and that of GO is  $\sim 0.6$  TPa, hence their mechanical properties are similar.[10]



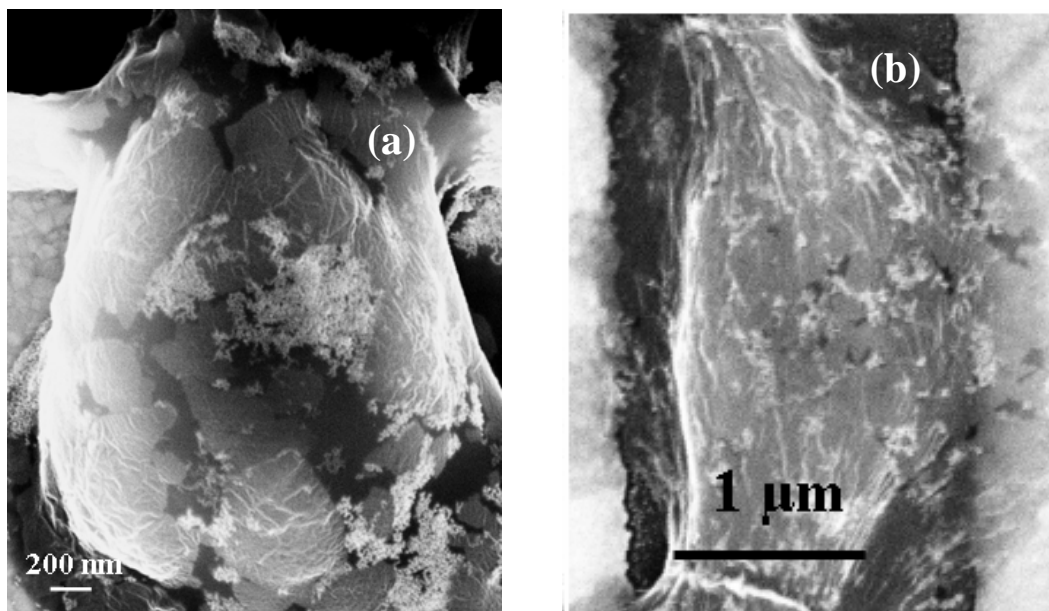

Figure S-6: FESEM image show that SaC bind with GO-Ca-Au sheets with qualitatively identical results as observed with CRG-Ca-Au

## References

1. Hummers, W. S.; Offeman, R.E. *J. Am. Chem. Soc.*, **1958**, 80, 1339.
2. Kovtyokhova, I.N.; Ollivier, J. P.; Martin, R. B.; Mallouk, E.T.; Chizhik, A. S.; Buzaneva, V.E.; Gorchinskiy, D.A. *Chem. Mater.*, **1999**, 11, 771.
3. Zhu, C.; Guo, S.; Fang, Y.; Dong, S. *ACS Nano*, **2010**, 4, 2429.
4. Maheshwari, V.; Kane J.; Saraf, R.F. *Adv. Mater*, **2008**, 20, 284.
5. Moon, I.K.M.; Lee, J.; Ruoff, R.S.; Lee, H.; *Nat. Commun.*, **2010**, doi: 10.1038/ncomms1067
6. Pimenta, M.A.; Dresselhaus, G.; Dresselhaus, M.S.; Cancado, L.G.; Jorio, A.; Saito, R.; *Phys. Chem. Chem. Phys.*, **2007**, 9, 1276.

7. Alwarappan, S.; Liu, C.; Kumar, A.; Li, C.Z.; *J. Phys. Chem. C* **2010**, 114, 12920.
8. He, S. J.; Song, B.; Li, D.; Zhu, C.F.; Qi, W.P.; Wen, Y.Q.; Wang, L.H.; Song, S.P.; Fang, H.P.; Fan, C.H. *Adv. Funct. Mater.* **2010**, 20, 453.
9. R. Kempaiah, A. Chung, V. Maheshwari, *ACS Nano* **2011**, 5, 6025.
10. Gomez-Navarro, C.; Burghard, M.; Kern, K.; *Nano Lett.* **2008**, 8, 2045
